# Supplementary material
Source: HighWire-hosted journal article supplement (https://bmjopen.bmj.com/content/10/1/e031602)
Supplement: inline-supplementary-material-2 [file inline-supplementary-material-2.pdf]

## Supplementary File 2

### **Ethical approval from the collaborators:**

Hospital Santa Casa – ISCMPA: nº 3.005.196

Hospital de Clínicas de Porto Alegre – HCPA: nº 3.280.908

Hospital Nossa Senhora da Conceição - HNSC: nº 3.022.805

Hospital João de Barros Barreto – HUJBB: nº 3.569.496

Fundação Centro de Controle de Oncologia do Estado do Amazonas: nº 3.477.026

Instituto de Assistência Médica ao Servidor Público Estadual – IAMSPE: nº 3.508.693

Universidade Federal de São Paulo – UNIFESP: nº 3.650.802

### **Ethical approval under evaluation:**

Hospital Universitário Maria Aparecida Pedrossian – HUMAP

Escola de Saúde Pública de Porto Alegre
